# Supplementary material for: Pravastatin Prevents Increases in Activity of Metalloproteinase-2 and Oxidative Stress, and Enhances Endothelium-Derived Nitric Oxide-Dependent Vasodilation in Gestational Hypertension
Source: MDPI journal article supplement (doi:10.3390/antiox12040939), 2023-04-16
Supplement: s1 [file s1]

**Supplementary Table S1.** Average of maternal, fetal placental and biochemical parameters.

| Parameter                                   | Norm-Preg     | Norm-Preg+Prava          | HTN-Preg       | HTN-Preg+Prava           |
|---------------------------------------------|---------------|--------------------------|----------------|--------------------------|
| Systolic blood pressure (mmHg)              | 110 ± 2       | 109 ± 1                  | 129 ± 2*       | 102 ± 1                  |
| Litter size (Number of pups)                | 9 ± 1         | 9 ± 2                    | 11 ± 2         | 10 ± 1                   |
| Placental weight (g)                        | 0.28 ± 0.01   | 0.29 ± 0.01              | 0.22 ± 0.01*   | 0.28 ± 0.01              |
| Plasma levels of NO metabolites (mmol/L)    | 0.30 ± 0.03   | 0.31 ± 0.02              | 0.22 ± 0.01*   | 0.29 ± 0.02              |
| Lipid peroxide levels (mmol/L)              | 0.11 ± 0.007  | 0.12 ± 0.005             | 0.17 ± 0.012*  | 0.13 ± 0.003             |
| Antioxidant capacity (mmol Trolox Equiv./L) | 0.17 ± 0.011  | 0.19 ± 0.019             | 0.07 ± 0.011*  | 0.19 ± 0.17              |
| Activity of 75 KDa MMP-2 (arbitrary units)  | 0.049 ± 0.008 | 0.050 ± 0.006            | 0.046 ± 0.007  | 0.045 ± 0.007            |
| Activity of 72 KDa MMP-2 (arbitrary units)  | 0.295 ± 0.025 | 0.0237 ± 0.019           | 0.247 ± 0.011  | 0.253 ± 0.019            |
| Activity of 65 KDa MMP-2 (arbitrary units)  | 0.073 ± 0.011 | 0.073 ± 0.006            | 0.100 ± 0.009* | 0.068 ± 0.006            |
| ACh R <sub>max</sub> (%)                    | 80.2 ± 5.4    | 85.1 ± 4.1               | 77.9 ± 6.8     | 85.5 ± 7.2               |
| ACh pEC <sub>50</sub> (-log M)              | 6.80 ± 0.12   | 7.69 ± 0.17 <sup>#</sup> | 6.83 ± 0.30    | 7.97 ± 0.14 <sup>#</sup> |

Data are expressed as means ± SEM in Norm-Preg (n = 8), Norm-Preg+Prava (n = 8), HTN-Preg (n = 8) and HTN-Preg+Prava (n = 8) groups. \*P < 0.05 vs Norm-Preg group, and <sup>#</sup>P < 0.05 vs. Norm-Preg and HTN-Preg groups.

## Zymography gel 1 of placenta

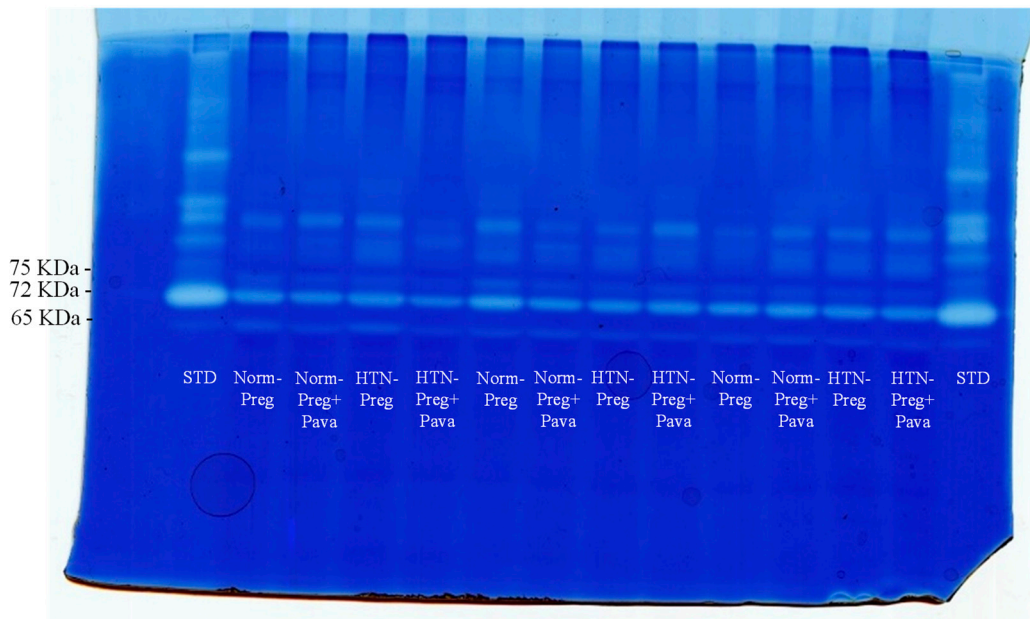

## Zymography gel 2 of placenta

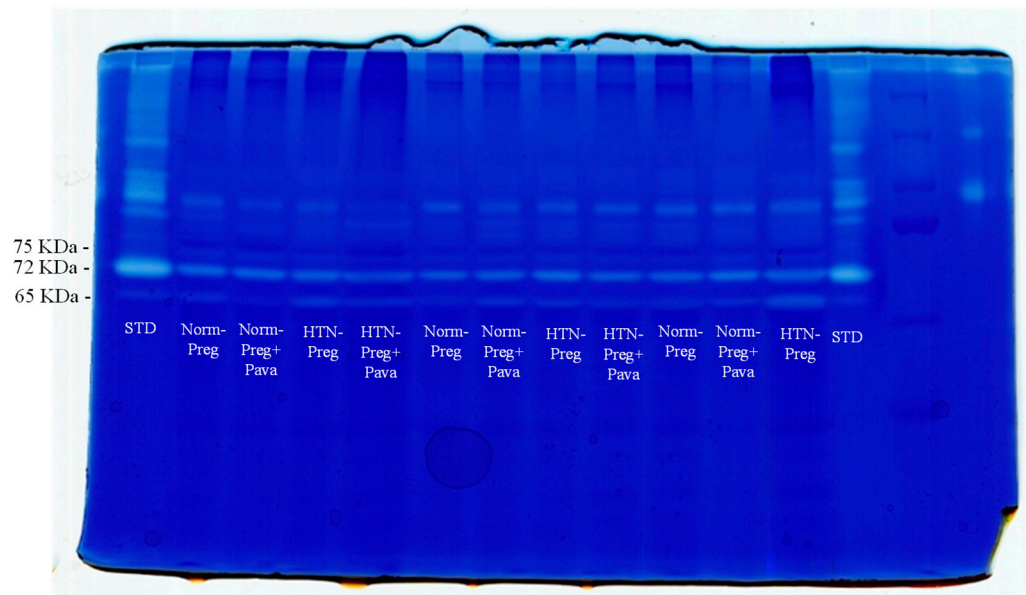

**Supplementary Figure S1.** Acrylamide gels (1 and 2) stained with Coomassie Brilliant Blue to quantify gelatinolytic activities of 75 KDa MMP-2, 72 KDa MMP-2 and 65 KDa MMP-2 in placenta samples from Norm-Preg, Norm-Preg+Prava, HTN-Preg and HTN-Preg+Prava groups. STD: internal standard.
